# Supplementary material
Source: publisher figshare collection journal article supplement (https://acs.figshare.com/ndownloader/files/28024986)
Supplement: Supplementary file 1 [file 28024986]

SUPPORTING INFORMATION:

Development of a PointNet for Detecting  
Morphologies of Self-Assembled Block  
Oligomers in Atomistic Simulations

Zhengyuan Shen,<sup>†,‡,¶</sup> Yangzesheng Sun,<sup>‡,¶</sup> Timothy P. Lodge,<sup>†,‡</sup> and  
J. Ilja Siepmann<sup>\*,†,‡,¶</sup>

<sup>†</sup>*Department of Chemical Engineering and Materials Science, University of Minnesota, 421  
Washington Avenue SE, Minneapolis, Minnesota 55455-0132, United States*

<sup>‡</sup>*Department of Chemistry, University of Minnesota, 207 Pleasant Street SE, Minneapolis,  
Minnesota 55455-0431, United States*

<sup>¶</sup>*Chemical Theory Center, University of Minnesota, 207 Pleasant Street SE, Minneapolis,  
Minnesota 55455-0431, United States*

E-mail: siepmann@umn.edu

## PointNet Model and Data Availability

The implementation of the PointNet models and sample data files are freely available from:

<https://github.com/donshen/pointnet.phasedetection>

**Table S1.** Details of the simulated systems used to generate the point clouds shown in Figure 3

| Compound                              | Structure | System Size | $T_{\text{SIM}}/\text{K}$ | Morphology |
|---------------------------------------|-----------|-------------|---------------------------|------------|
| $\text{A}_4\text{B}(\text{B}_8)_3$    |           | 594         | 460                       | BCC        |
| $\text{A}_4\text{B}(\text{B}_{10})_2$ |           | 500         | 490                       | HPC        |
| $\text{A}_2\text{B}_7\text{A}_2$      |           | 1000        | 430                       | LAM        |
| $\text{B}_6\text{A}_4\text{B}_6$      |           | 1504        | 440                       | HPL        |
| $\text{A}_2\text{B}_{12}\text{A}_2$   |           | 1000        | 520                       | DIS        |

**Table S2.** Details of all the simulated systems to generate point clouds for all morphologies other than NET structures.

| Compound         | Structure                                                                           | System Size | $T_{\text{SIM}}/\text{K}$ | Morphology |
|------------------|-------------------------------------------------------------------------------------|-------------|---------------------------|------------|
| $A_2B_4A_2$      | 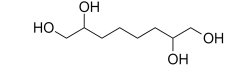   | 1000        | 400                       | DIS        |
| $A_2B_6A_2$      |    | 1000        | 400                       | LAM        |
|                  |                                                                                     | 1000        | 460                       | DIS        |
| $A_2B_7A_2$      |    | 1000        | 400                       | LAM        |
|                  |                                                                                     | 1000        | 460                       | DIS        |
| $A_2B_8A_2$      |    | 1000 & 8000 | 400                       | LAM        |
|                  |                                                                                     | 1000        | 460                       | DIS        |
| $A_2B_{10}A_2$   |    | 1000        | 400                       | LAM        |
|                  |                                                                                     | 1000        | 460                       | DIS        |
| $A_2B_{12}A_2$   |    | 1000        | 430                       | LAM        |
|                  |                                                                                     | 1000        | 490                       | DIS        |
| $A_3B_{12}A_3$   |    | 1000        | 460                       | LAM        |
|                  |                                                                                     | 1000        | 550                       | DIS        |
| $A_3B_{12}A_3$   |   | 1000        | 460                       | LAM        |
|                  |                                                                                     | 1000        | 550                       | DIS        |
| $B_6A_4A_6$      |  | 1504        | 440                       | HPL        |
|                  |                                                                                     | 1504        | 490                       | DIS        |
| $A_3B_6$         |  | 1000        | 400                       | LAM        |
|                  |                                                                                     | 1000        | 460                       | DIS        |
| $A_4B_{12}$      |  | 1000        | 490                       | LAM        |
|                  |                                                                                     | 1000        | 550                       | DIS        |
| $A_6B_{12}$      |  | 1000        | 580                       | LAM        |
|                  |                                                                                     | 1000        | 670                       | DIS        |
| $A_4B(B_8)_2$    |  | 500 & 4000  | 490                       | HPC        |
|                  |                                                                                     | 500         | 550                       | DIS        |
| $A_4B(B_{10})_2$ |  | 500         | 490                       | HPC        |
|                  |                                                                                     | 500         | 550                       | DIS        |
| $A_4B(B_8)_3$    |  | 594         | 460                       | BCC        |
|                  |                                                                                     | 594         | 550                       | DIS        |
| $A_{10}B_{20}$   |  | 600         | 640                       | LAM        |
| $A_8B(B_{18})_2$ |  | 600         | 610                       | HPC        |

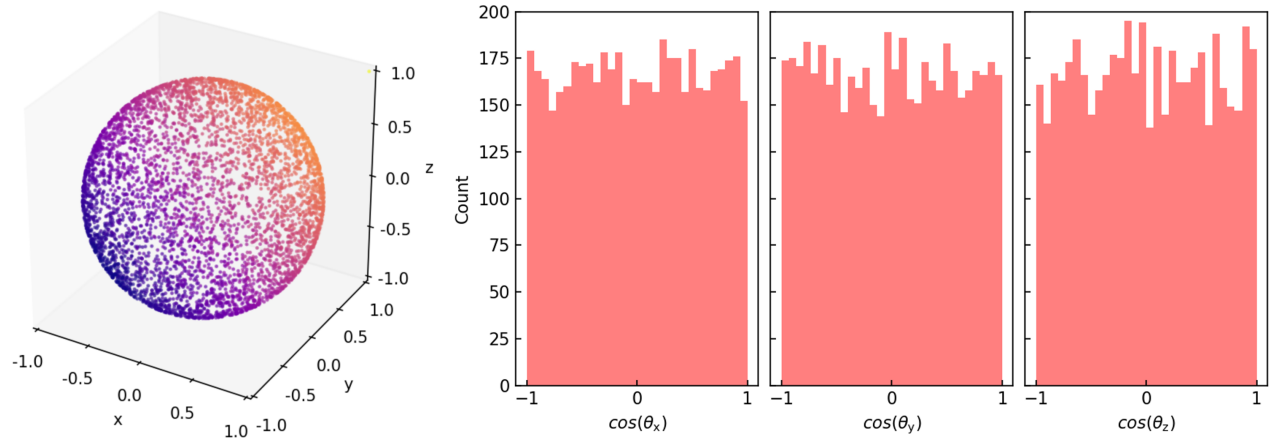

**Figure S1.** (Left) Unit vectors obtained by multiplying 5000 random rotation matrices  $\mathbf{M}_{\text{rot}}$  to the vector  $[1,0,0]$ . (Right) Distributions of the cosines of angles between the rotated vectors and the three Cartesian axes.

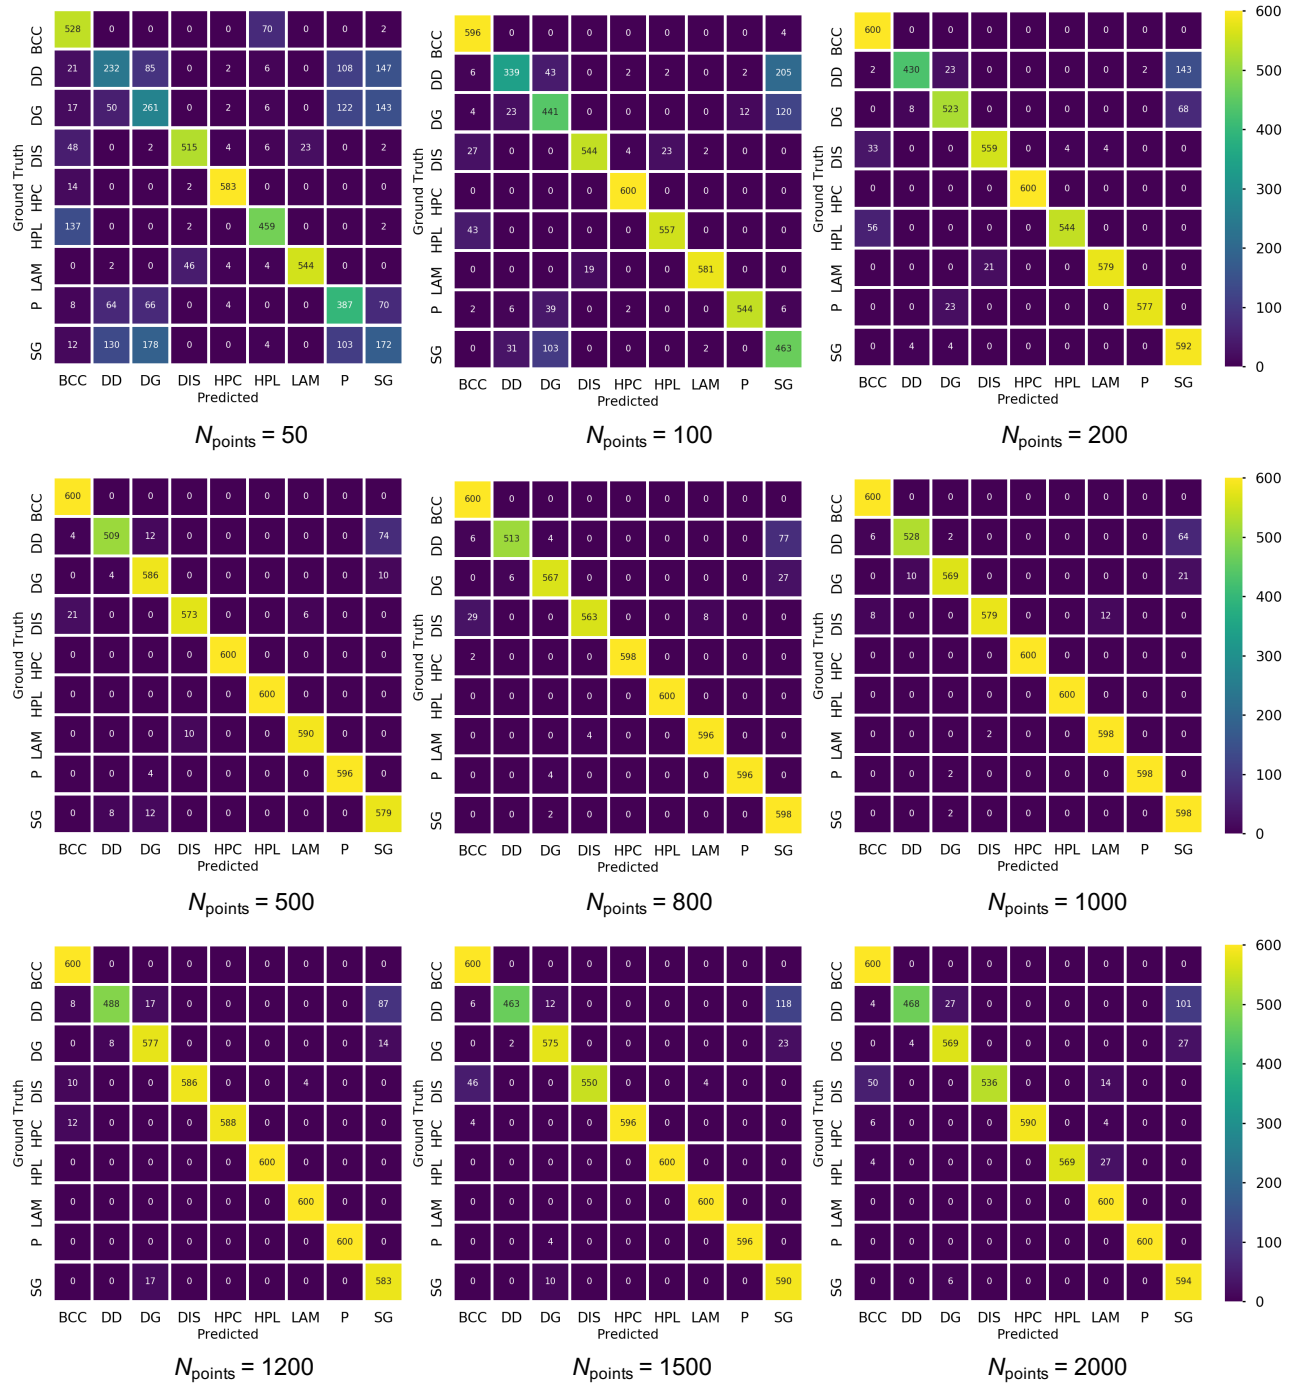

**Figure S2.** Confusion matrices for the test data achieved with model A for different sizes of input point clouds.

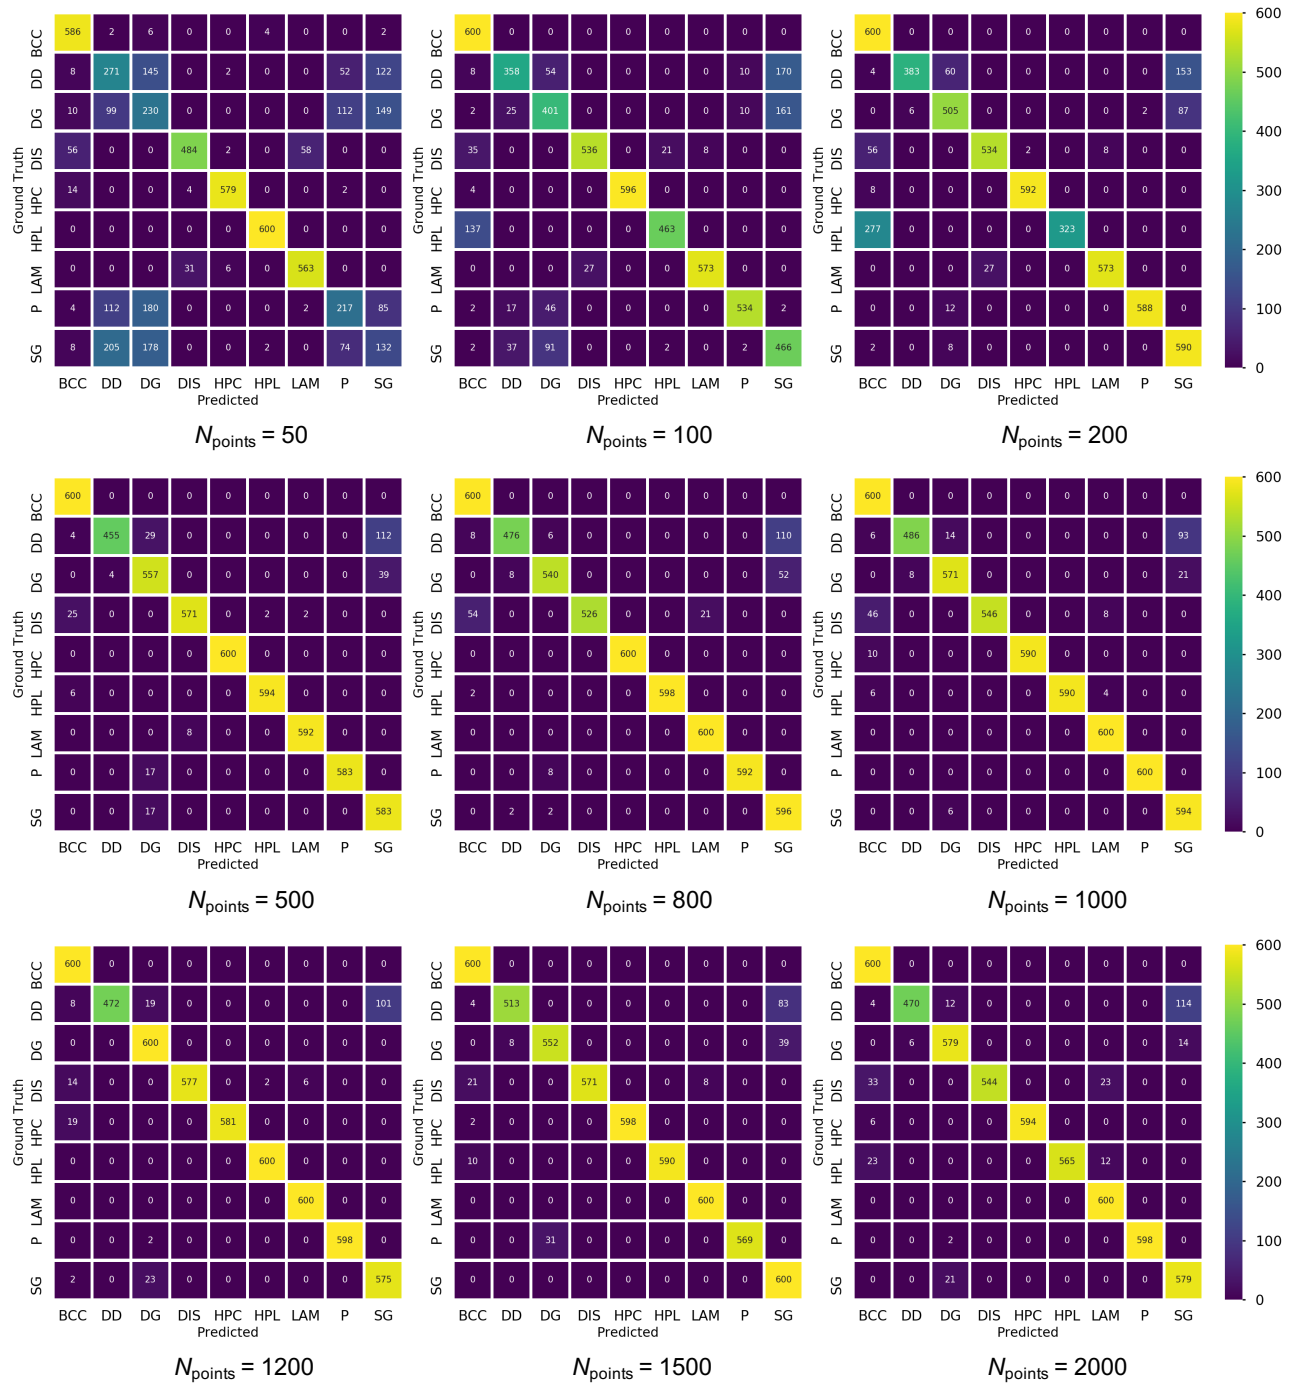

**Figure S3.** Confusion matrices for the test data achieved with model B for different sizes of input point clouds.

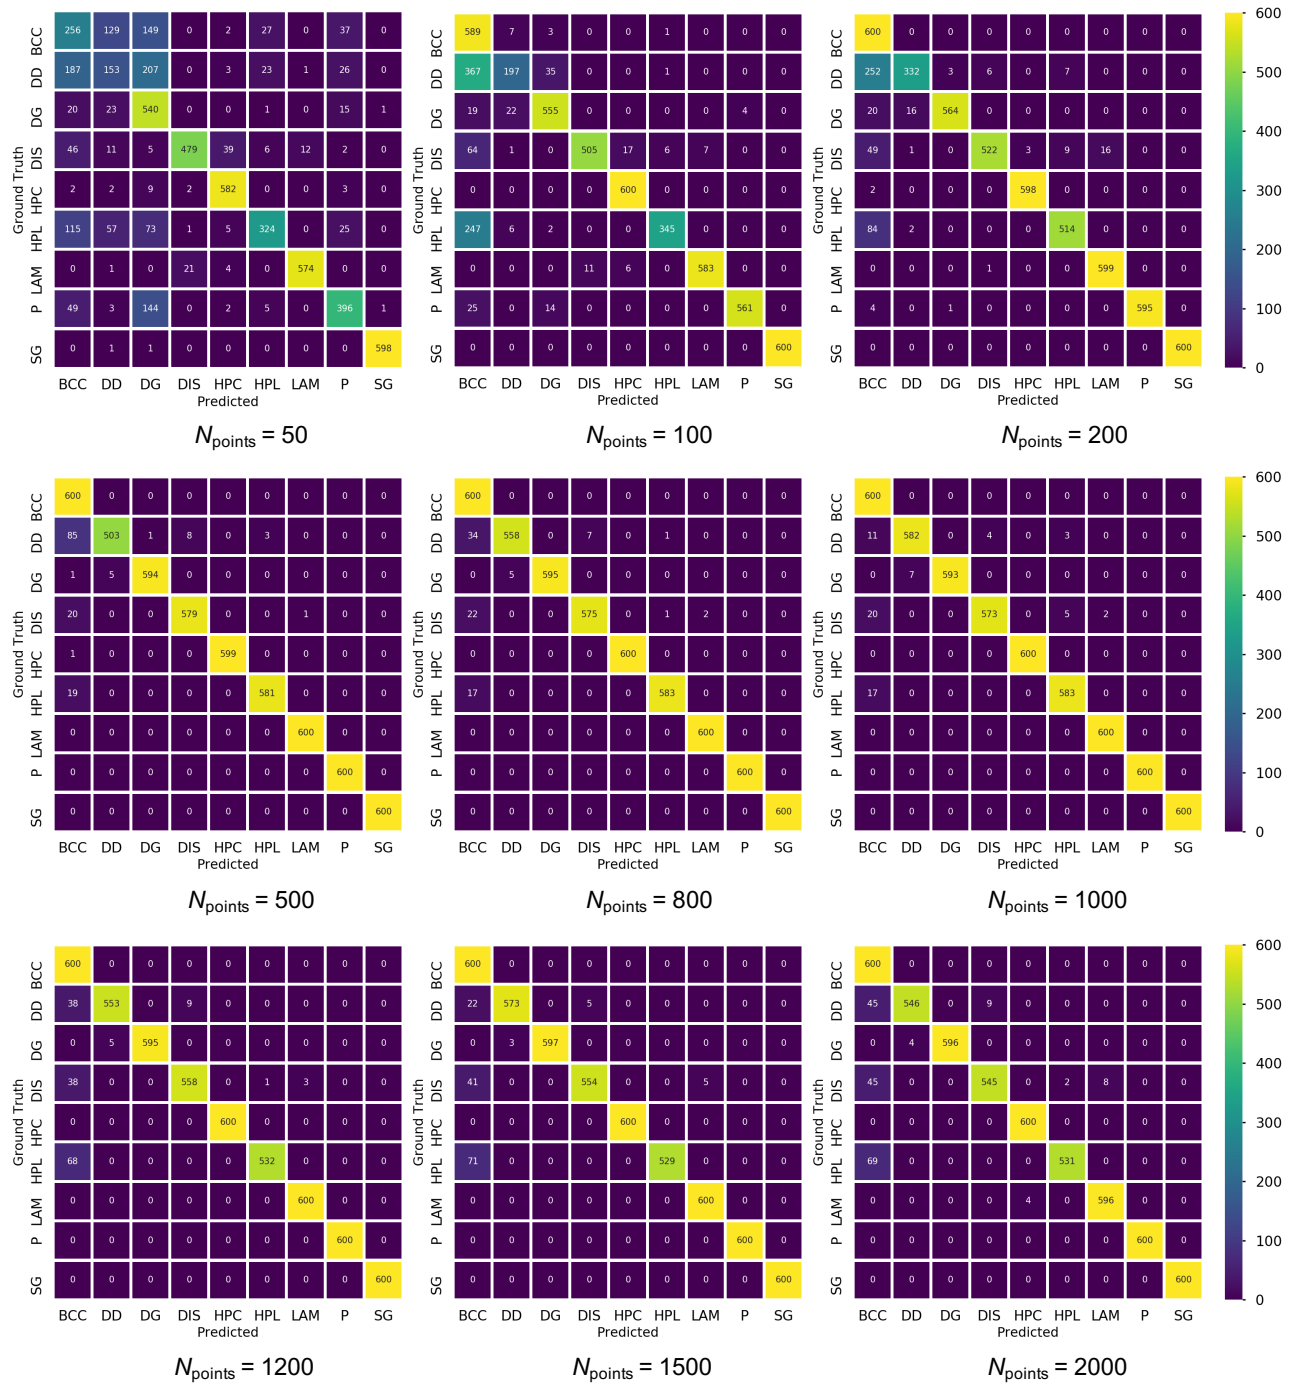

**Figure S4.** Confusion matrices for the test data achieved with model C for different sizes of input point clouds.

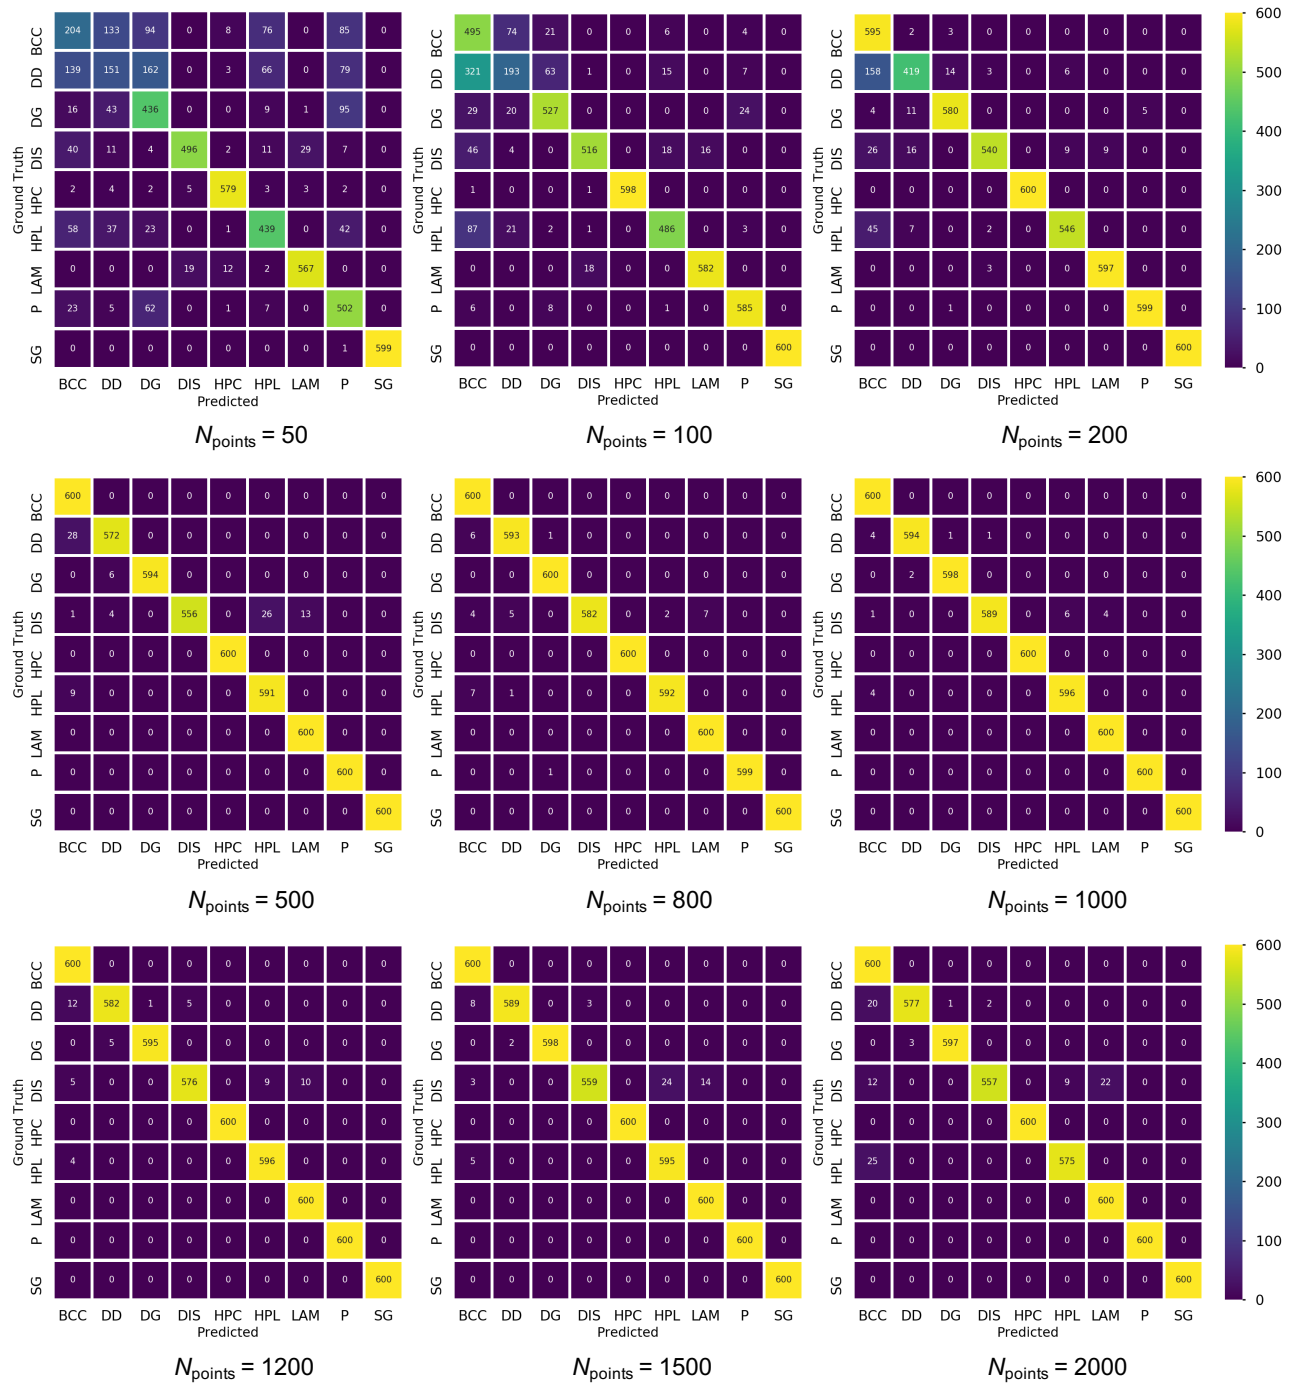

**Figure S5.** Confusion matrices for the test data achieved with model D for different sizes of input point clouds.



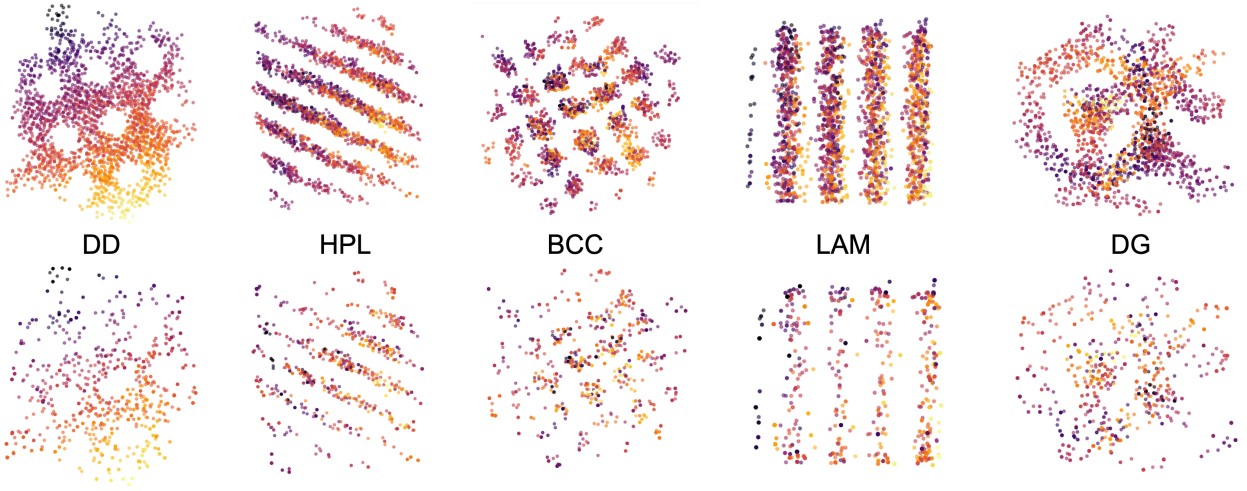

**Figure S6.** Examples of input point clouds with  $N_{\text{points}} = 2000$  (top) and the critical points with highest contributions to the max-pooled features (bottom). To guide the eye, the point clouds are colored from yellow to purple according to a point's average values of its  $x$ ,  $y$ , and  $z$  coordinates.

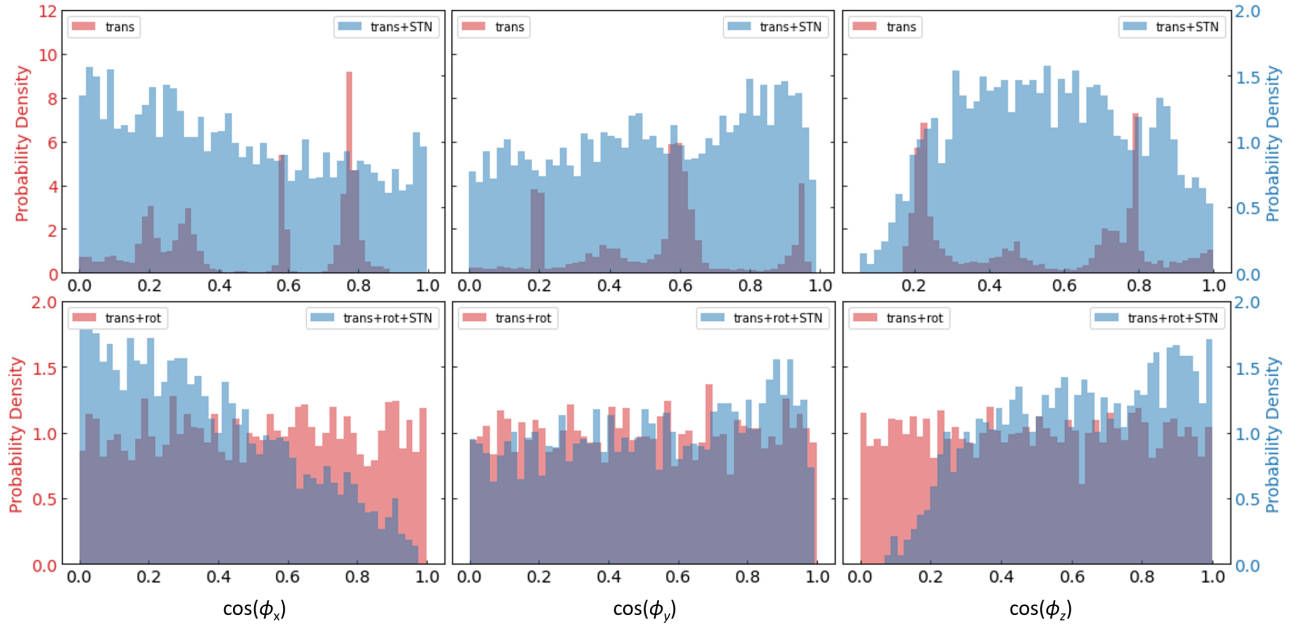

**Figure S7.** Orientational distributions of the vector perpendicular to the lamellar plane for the systems with LAM morphology: (top row) models A and B; (bottom row) models C and D.

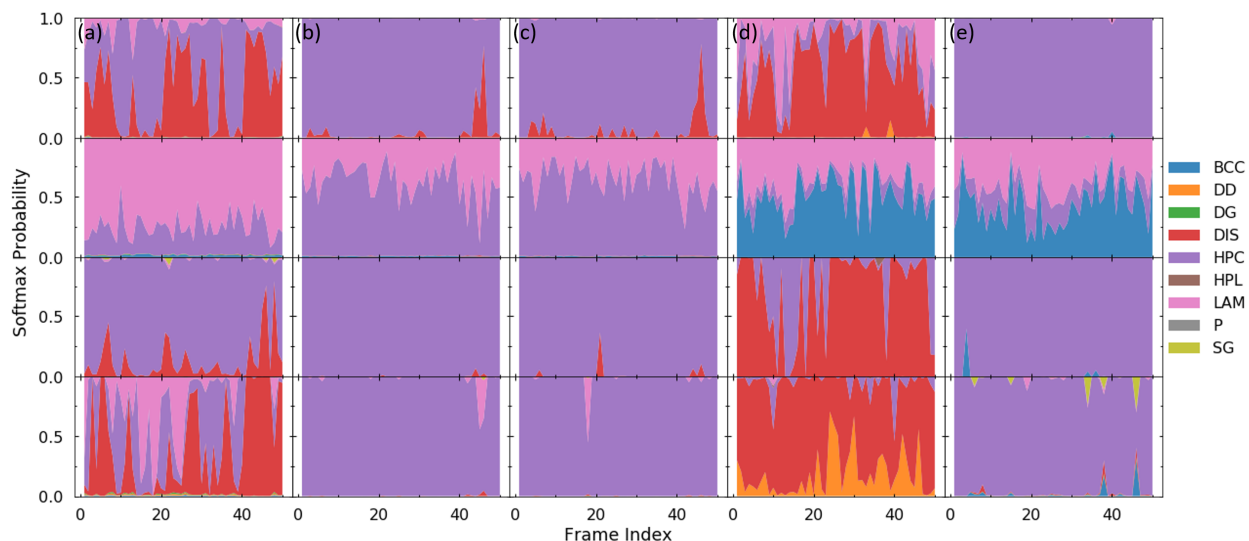

**Figure S8.** Stack plots of the predicted softmax classification probabilities obtained with models A, B, C, and D (top to bottom) for 50 frames taken at 10-ns intervals during a 500-ns MD trajectory. Data in columns (a)-(c) are for a 600-molecule  $A_8B(B_{18})_2$  system with 1000 oxygen atoms for the point cloud selected at random from (a) all oxygen atoms, (b) only from oxygen atoms in positions 1, 3, 5, and 7 of the polar group, and (c) only from oxygen atoms in positions 2, 5, and 8 of the polar group. Data in columns (d) and (e) are for a 8000-molecule system of the  $A_4B(B_8)_2$  block oligomer with 1000 oxygen atoms for the point cloud selected at random from (d) all oxygen atoms, and (e) only from oxygen atoms located in a subvolume with linear dimensions of  $L_x/2$ ,  $L_y/2$ , and  $L_z/2$ , where  $L_x$ ,  $L_y$ , and  $L_z$  are the box lengths for the entire simulation box.
